# Supplementary material for: Analysing Institutions Interdisciplinarity by Extensive Use of Rao-Stirling Diversity Index
Source: PLOS journal article supplement (doi:10.1371/journal.pone.0170296), 2017-01-23

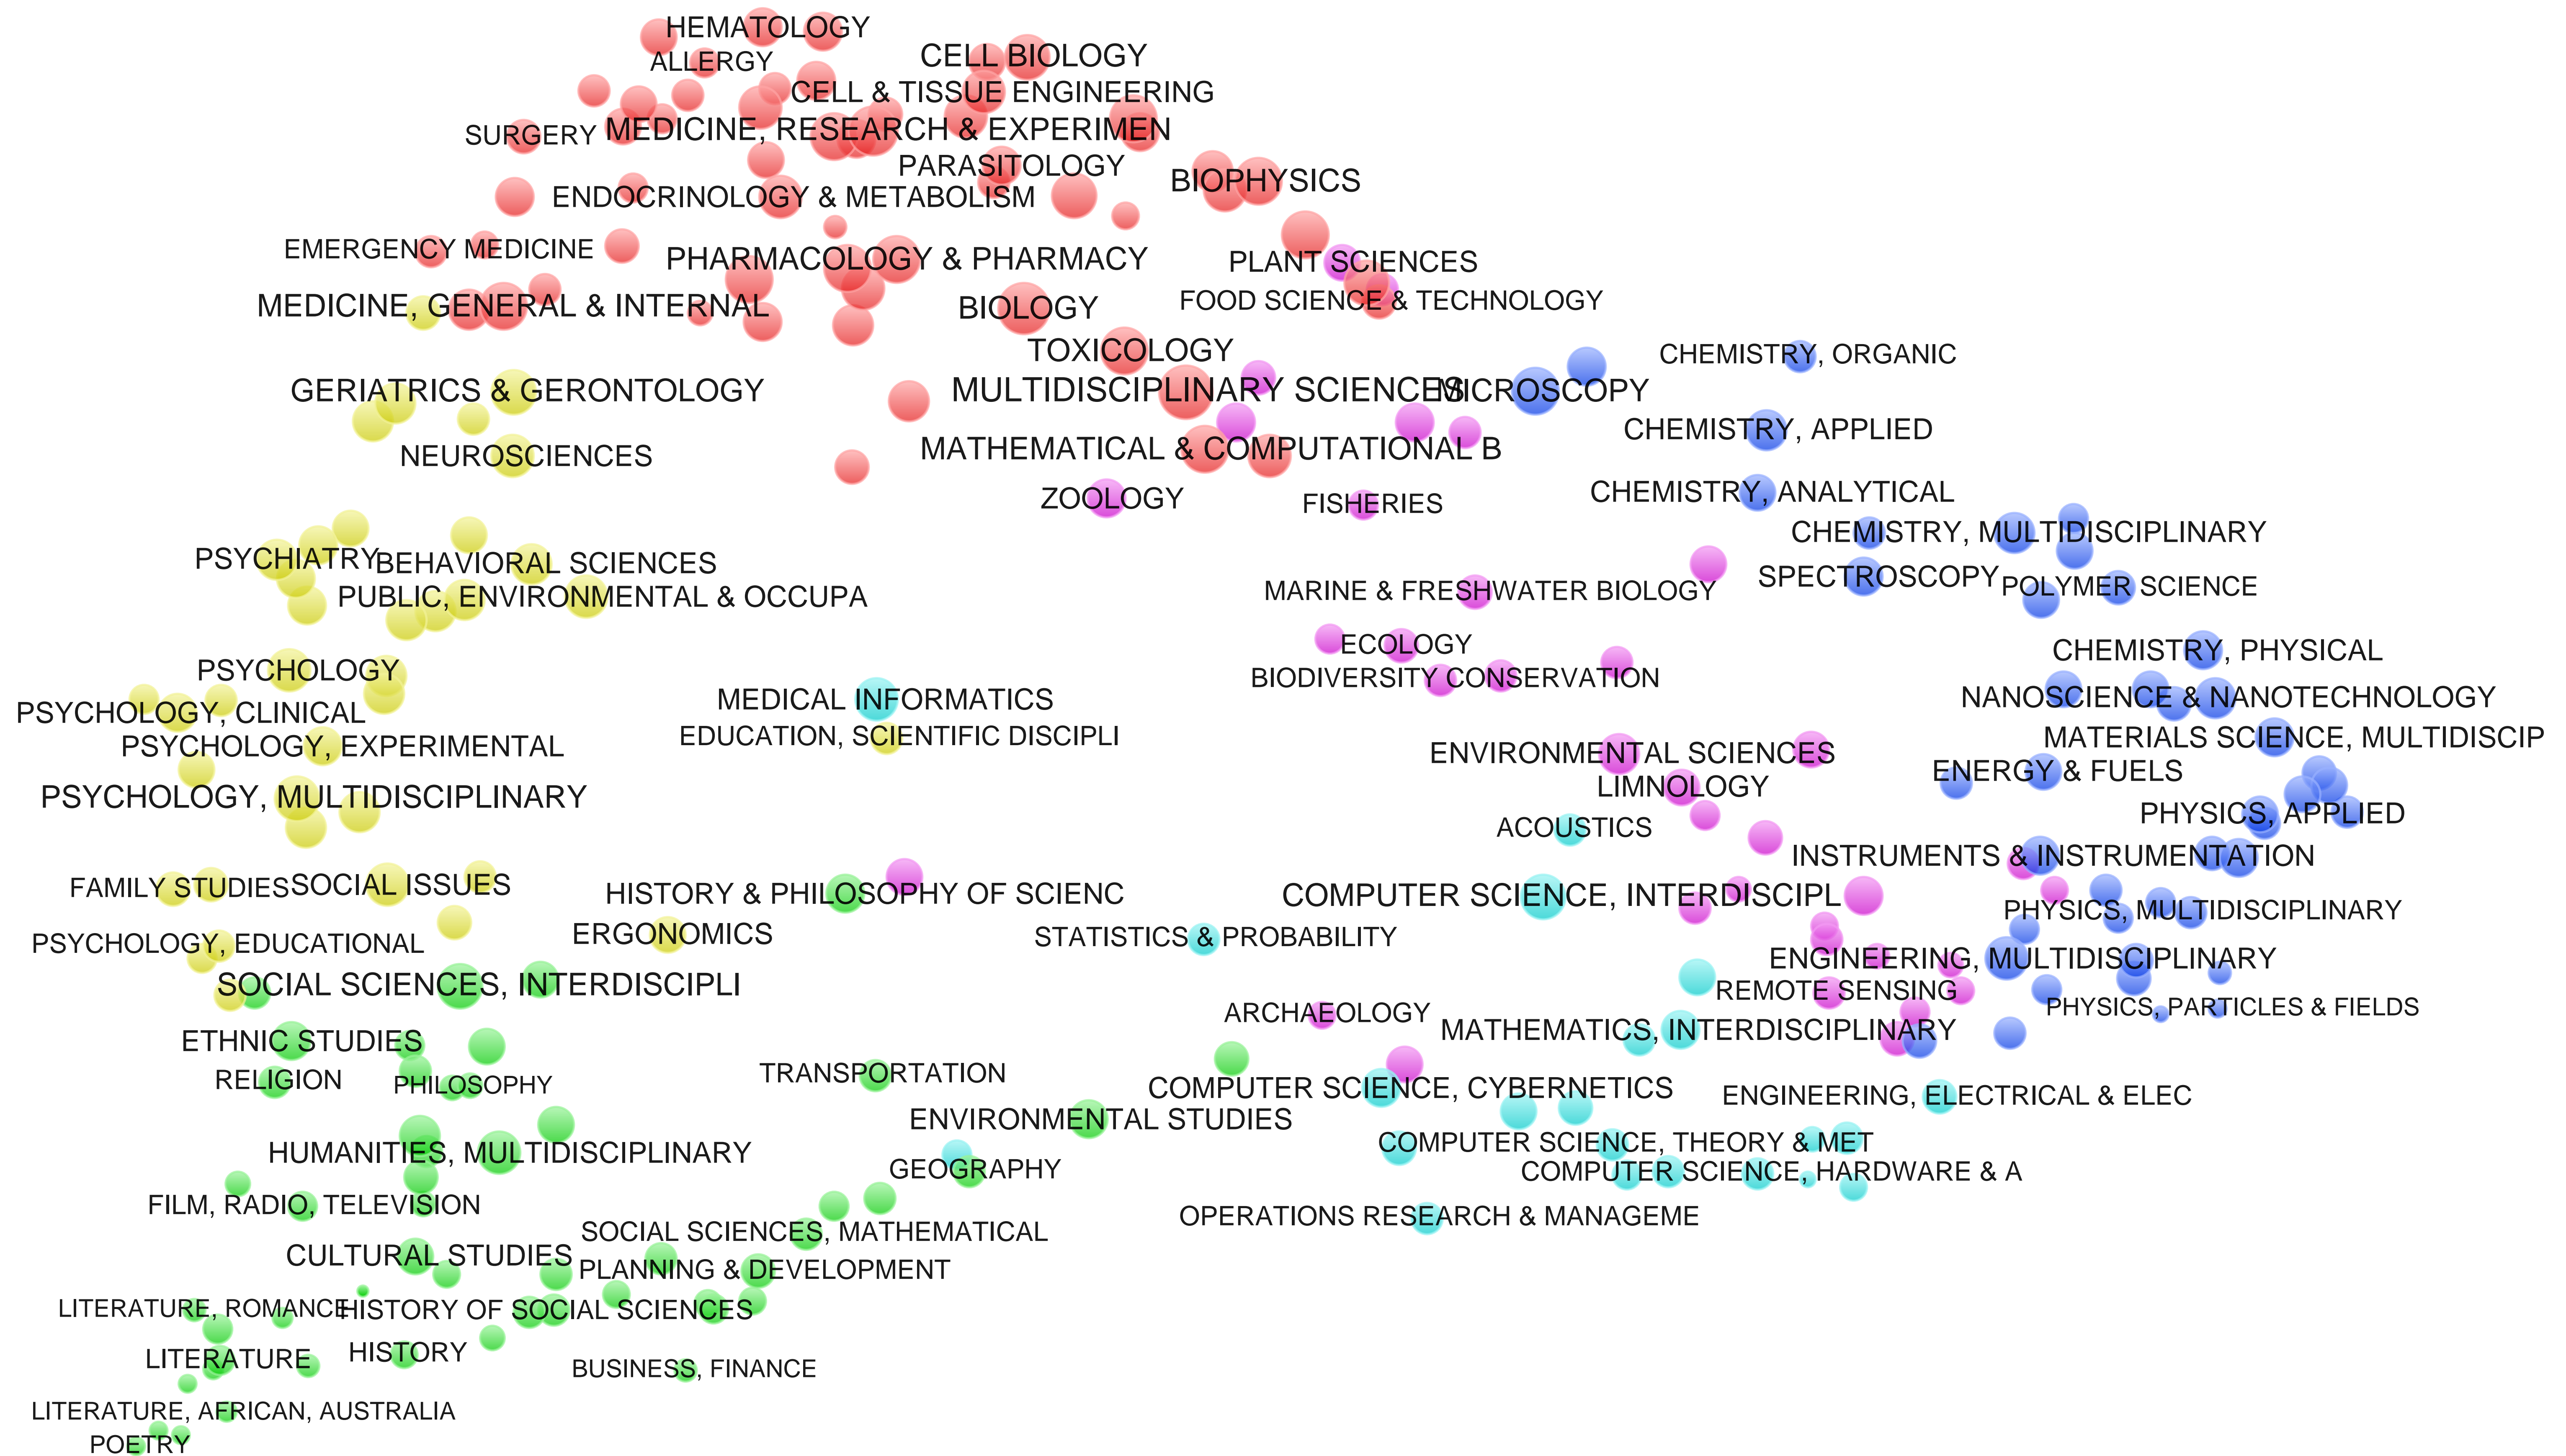

Supplement: S4 (10.1371/journal.pone.0170296.s004) [file journal.pone.0170296.s004]
